# Supplementary material for: A frog in hot water: the effect of temperature elevation on the adrenal stress response of an African amphibian
Source: PeerJ. 2024 Aug 13;12:e17847. doi: 10.7717/peerj.17847 (PMC11328835; doi:10.7717/peerj.17847)
Supplement: Table S1 [file peerj-12-17847-s001.xlsx]

## Sheet: MASS
ID	group	state	weight
CBR 034	Control	Week 1 Ctr	226
CBR 034	Control	Week 5 Ctr	220
CBR 034	Control	Week 10 Ctr	222
CBR 035	Control	Week 1 Ctr	228
CBR 035	Control	Week 5 Ctr	233
CBR 035	Control	Week 10 Ctr	232
CBR 046	Control	Week 1 Ctr	224
CBR 046	Control	Week 5 Ctr	227
CBR 046	Control	Week 10 Ctr	233
CBR 051	Control	Week 1 Ctr	131
CBR 051	Control	Week 5 Ctr	141
CBR 051	Control	Week 10 Ctr	144
CBR 053	Control	Week 1 Ctr	269
CBR 053	Control	Week 5 Ctr	273
CBR 053	Control	Week 10 Ctr	270
CBR 060	Control	Week 1 Ctr	153
CBR 060	Control	Week 5 Ctr	152
CBR 060	Control	Week 10 Ctr	158
CBR 064	Control	Week 1 Ctr	286
CBR 064	Control	Week 5 Ctr	280
CBR 064	Control	Week 10 Ctr	287
CBR 012	Experimental	Week 1 EXP	205
CBR 012	Experimental	Week 5 EXP	203
CBR 012	Experimental	Week 10 EXP	180
CBR 019	Experimental	Week 1 EXP	119
CBR 019	Experimental	Week 5 EXP	124
CBR 019	Experimental	Week 10 EXP	107
CBR 020	Experimental	Week 1 EXP	154
CBR 020	Experimental	Week 5 EXP	151
CBR 020	Experimental	Week 10 EXP	130
CBR 069	Experimental	Week 1 EXP	286
CBR 069	Experimental	Week 5 EXP	288
CBR 069	Experimental	Week 10 EXP	271
CBR 074	Experimental	Week 1 EXP	158
CBR 074	Experimental	Week 5 EXP	154
CBR 074	Experimental	Week 10 EXP	137
CBR 076	Experimental	Week 1 EXP	232
CBR 076	Experimental	Week 5 EXP	238
CBR 076	Experimental	Week 10 EXP	215
CBR 078	Experimental	Week 1 EXP	219
CBR 078	Experimental	Week 5 EXP	219
CBR 078	Experimental	Week 10 EXP	207

## Sheet: % change
ID	group	Baseline mass	End mass	mass change
CBR 012	Experimental	100	87.8	-12.2
CBR 019	Experimental	100	89.9	-10.1
CBR 020	Experimental	100	84.42	-15.58
CBR 069	Experimental	100	94.76	-5.24
CBR 074	Experimental	100	86.71	-13.29
CBR 076	Experimental	100	92.67	-7.33
CBR 078	Experimental	100	94.52	-5.48
CBR 034	Control	100	98.23	-1.77
CBR 035	Control	100	101.75	1.75
CBR 046	Control	100	104.02	4.02
CBR 051	Control	100	109.92	9.92
CBR 053	Control	100	100.37	0.37
CBR 060	Control	100	103.27	3.27
CBR 064	Control	100	100.35	0.35
